# Supplementary material
Source: HighWire-hosted journal article supplement (https://www.cmaj.ca/highwire/filestream/59240/field_highwire_adjunct_files/0/186_3.pdf)
Supplement: 186_3.pdf [file 186_3.pdf]

## ÉDITORIAL

## Nouvelle politique du JAMC sur le partage des données de recherche clinique

John Fletcher MB BChir MPH

Pour la version anglaise de l'éditorial, veuillez consulter la page 163.

À compter du 1<sup>er</sup> avril 2014, le JAMC exigera des auteurs d'essais cliniques portant sur des médicaments et des dispositifs médicaux l'inclusion dans leurs manuscrits d'un énoncé concernant le partage des données; toutefois, nous n'exigerons pas que les auteurs acceptent de partager leurs données, quel que soit le type de recherche. Nous accepterons volontiers les énoncés de partage de données pour tous les articles de recherche, mais ils ne seront obligatoires que pour les essais cliniques. Dans leur énoncé, les auteurs devront indiquer si d'autres personnes ont accès à une partie ou à la totalité des données et, le cas échéant, où, par quelle voie, quand, comment et à quelles conditions les données seront accessibles.

Certaines revues médicales, telles que *BMJ* et *PLoS Medicine*, encouragent le partage des données depuis plusieurs années et l'année dernière, le *BMJ* a rendu le partage de données obligatoire pour la publication d'essais cliniques. Le JAMC adopte une politique d'application volontaire à cet égard. Pourquoi ? Parce que nous savons que de nombreux chercheurs sont heureux de collaborer de manière transparente et sont prêts à donner à d'autres chercheurs l'accès à leurs données. Pour eux, il n'est pas nécessaire d'imposer ce partage. Deux groupes ont cependant un grand intérêt à résister aux initiatives de partage des données à grande échelle. Premièrement, ceux qui vendent un produit ou service et qui ont effectué la recherche risquent de perdre des ventes s'ils divulguent des données révélant des résultats défavorables. Les compagnies pharmaceutiques soutiennent fermement que les données issues des essais cliniques sont des renseignements commerciaux confidentiels et de nombreuses compagnies ont refusé les demandes de diffusion plus large de leurs données. Deuxièmement, les chercheurs qui doivent « publier ou périr » et qui comptent sur leurs données comme ressource pour plusieurs de leurs articles risquent de perdre des occasions de publication s'ils révèlent l'ensemble de leurs données avant d'avoir trouvé le temps ou les ressources nécessaires pour mener à bien toutes les publications prévues.

Parce que les deux groupes qui ont le plus à perdre sont les mêmes que ceux qui ont actuellement le contrôle des données, il faudra d'abord répondre à leurs besoins avant qu'un changement significatif ne se produise. Les chercheurs peuvent protéger leurs intérêts en accordant une attention particulière aux définitions des données et en choisissant le bon moment pour les rendre accessibles. Par exemple, ils pourraient en premier lieu accorder l'accès à des ensembles restreints de données qui ne concernent que les analyses pertinentes au moment de

la publication, puis accorder l'accès à l'ensemble des données quelques années plus tard. Pour les fabricants de médicaments et de dispositifs médicaux, le problème est plus épineux. Ils paient pour la recherche dans le cadre du processus d'homologation et peuvent revendiquer la propriété de l'information produite. La société exige toutefois d'avoir accès à cette recherche en vertu de la réglementation relative à l'homologation des produits et, habituellement, les participants à la recherche prennent part à des essais en pensant contribuer à un bien commun et non seulement aux profits d'une entreprise. Les instances réglementaires ou d'autres grandes organisations doivent prendre en compte ces intérêts divergents.

Le Nordic Cochrane Centre et le *BMJ* ont attisé l'intérêt actuel pour le partage des données en demandant la divulgation complète des données des essais cliniques concernant l'efficacité du Tamiflu (oseltamivir), un médicament qui a été accumulé pour constituer des réserves importantes dans les pays industrialisés dans le cadre de la planification d'urgence en vue d'une pandémie éventuelle de grippe<sup>1</sup>. Or, malgré tous les efforts déployés, les chercheurs disent qu'environ 60 % des données issues des essais cliniques sur le Tamiflu demeurent occultées<sup>2</sup>.

Encourager le partage transparent et volontaire des données a ses avantages, même si cela ne peut empêcher directement la dissimulation intentionnelle des données. Le partage des données pourrait fournir des réponses aux questions suivantes : Est-ce qu'ils ont bien compris ? Un détail important leur a-t-il échappé ? Pouvons-nous utiliser ces données pour engendrer de nouvelles connaissances ?

L'examen par les pairs universitaires vise principalement à assurer la crédibilité de la recherche publiée, mais il est bien connu que ce processus est un mauvais détecteur d'erreurs ou de fraude. Les politiques rédactionnelles existantes permettent aux rédacteurs de demander aux auteurs l'accès à leurs données d'origine dans le cadre du processus d'examen par les pairs. Cependant, avant sa publication, un manuscrit n'est souvent examiné que par quelques personnes. Étendre l'examen aux données sous-jacentes durant la période suivant la publication est une étape logique.

Le partage des données peut également être bénéfique pour la société en permettant la création de nouvelles connaissances de façons qui seraient impossibles sans coopération. Par exemple, les effets des interventions sont rarement uniformes et peuvent varier selon les populations de patients. Il faut produire une grande quantité de données pour effectuer

les analyses servant à détecter de tels effets dans ces sous-groupes et permettre aux médecins de personnaliser les options de traitement. Sans l'accès aux données de patients individuels, ces analyses sont impossibles.

Heureusement, il existe des chercheurs et des entreprises qui ont déjà adopté le partage des données. Entre autres, tout chercheur canadien ayant une question de recherche raisonnable et un plan analytique a accès aux données de l'Enquête sur la santé dans les collectivités canadiennes. Le laboratoire Glaxo-SmithKline a un registre en ligne de tous ses essais et dit qu'il va permettre aux scientifiques de demander l'accès à des données anonymisées des patients<sup>2</sup>. Les chercheurs qui souhaitent partager leurs données peuvent utiliser des sites comme [www.datadryad.org](http://www.datadryad.org). En rejoignant les partisans de l'adoption

précoce, le *JAMC* espère encourager les chercheurs canadiens à adopter une nouvelle norme, de sorte que la société puisse vérifier s'ils ont fait la bonne chose, s'assurer qu'un détail important ne leur a pas échappé et leur demander l'utilisation de leurs données pour engendrer de nouvelles connaissances.

## Références

1. Tamiflu campaign. *BMJ* 2014. Disponible: [www.bmj.com/tamiflu](http://www.bmj.com/tamiflu) (consulté 2014 Jan. 13)
2. Collier R. UK Parliament calls for sharing of all clinical trial data. *CMAJ* 2014; Jan. 13 [publication électronique avant impression].

**Intérêts concurrents :** Se rendre à [www.cmaj.ca/site/misc/cmaj\\_staff.shtml](http://www.cmaj.ca/site/misc/cmaj_staff.shtml)

**Affiliations :** John Fletcher est rédacteur en chef, *JAMC*

**Correspondance à :** Éditeur du *JAMC*, [pubs@cmaj.ca](mailto:pubs@cmaj.ca)

## RÉSUMÉS DE RECHERCHE

# Lignes directrices 2.0 : systématisation d'une liste de vérification complète pour assurer la réussite des projets de conception de lignes directrices

Holger J. Schünemann MD PhD, Wojtek Wiercioch BHSc, Itziar Etxeandia Pharm D, Maicon Falavigna MD PhD, Nancy Santesso MLIS, Reem Mustafa MD MPH, Matthew Ventresca BHSc, Romina Brignardello-Petersen DDM, Kaja-Triin Laisaar MD MPH, Sérgio Kowalski MD PhD, Tejan Baldeh, Yuan Zhang BHSc, Ulla Raid PhD, Ignacio Neumann MD, Susan L. Norris MD MPH, Judith Thornton PhD, Robin Harbour BSc, Shaun Treweek PhD, Gordon Guyatt MD MS, Pablo Alonso-Coello MD PhD, Marge Reinap MA, Jan Brožek MD, Andrew Oxman MD MS, Elie A. Akl MD PhD

Pour la version anglaise de ce résumé, veuillez consulter la page 189.

**Contexte :** Même si plusieurs outils existent pour évaluer la crédibilité des lignes directrices dans le domaine des soins de santé, on ne dispose d'aucune marche à suivre pour les différentes étapes menant à la conception de ces documents. Nous avons compilé de manière systématique une liste complète des différents éléments requis, en lien avec des ressources et des outils pertinents dont les concepteurs de lignes directrices pourraient tenir compte, sans toutefois s'attendre à ce que chaque ligne directrice soit affectée par chacun des différents éléments de la liste.

**Méthodes :** Nous avons interrogé différentes sources de données, dont des manuels produits par des concepteurs de lignes directrices internationales, la littérature concernant les guides de rédaction de lignes directrices (en mettant l'accent sur les rapports de méthodologie provenant d'agences internationales et nationales et de sociétés professionnelles) et des articles récents d'orientation globale. Nous avons passé en revue ces sources en parallèle, extrait les éléments à inscrire à la liste de vérification en utilisant une approche sensible et dégagé les thèmes les plus importants relativement aux

lignes directrices. Selon un processus itératif, nous avons passé en revue les éléments pour relever les cas de double emploi et les omissions et nous avons demandé à des experts en rédaction de lignes directrices de réviser la liste et de suggérer des ajouts au besoin.

**Résultats :** Nous avons préparé une liste de vérification comportant 18 thèmes et 146 éléments, de même qu'une page web pour faciliter son utilisation par les concepteurs de lignes directrices. Les thèmes et les éléments inclus abordent toutes les étapes de la conception de lignes directrices, de leur planification à leur rédaction, et de leur application et à leur évaluation. La liste de vérification finale inclut des liens vers des documents de formation, de même que des ressources et une méthodologie suggérée pour l'application des éléments.

**Interprétation :** La liste de vérification servira de ressource pour les concepteurs de lignes directrices. La consultation des éléments présentés dans la liste de vérification facilitera l'élaboration, l'application et l'évaluation des lignes directrices. Nous utiliserons l'externalisation ouverte pour réviser la liste de vérification et la maintenir à jour.

**Intérêts concurrents :** Aucun déclaré. Les auteurs de ce manuscrit ont participé à l'élaboration de divers guides de rédaction des lignes directrices cités dans cet article.

Cet article a été revu par les pairs.

**Correspondance à :** Holger Schünemann, [schuneh@mcmaster.ca](mailto:schuneh@mcmaster.ca)
